# Supplementary material
Source: publisher figshare collection journal article supplement (https://tandf.figshare.com/articles/dataset/_/12319646)
Supplement: Supplementary file 2 [file 4]

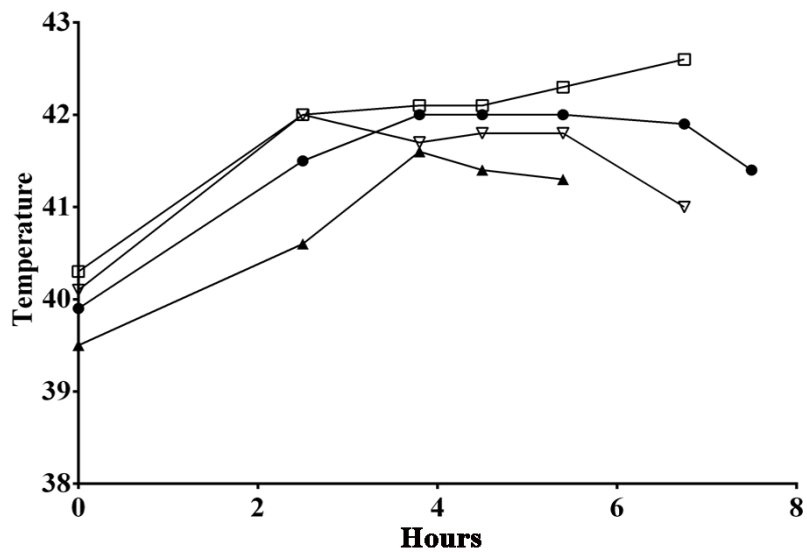

**Figure S1. Clinical features of pigs infected intravenously and epidurally with strain 10.** The rectal temperature was evaluated at time 0 and each hour after infection over a time course of 8 hours. Each symbol represents one individual animal.
