# Supplementary material
Source: publisher figshare collection journal article supplement (https://tandf.figshare.com/articles/dataset/_/12319646)
Supplement: Supplementary file 3 [file 4]

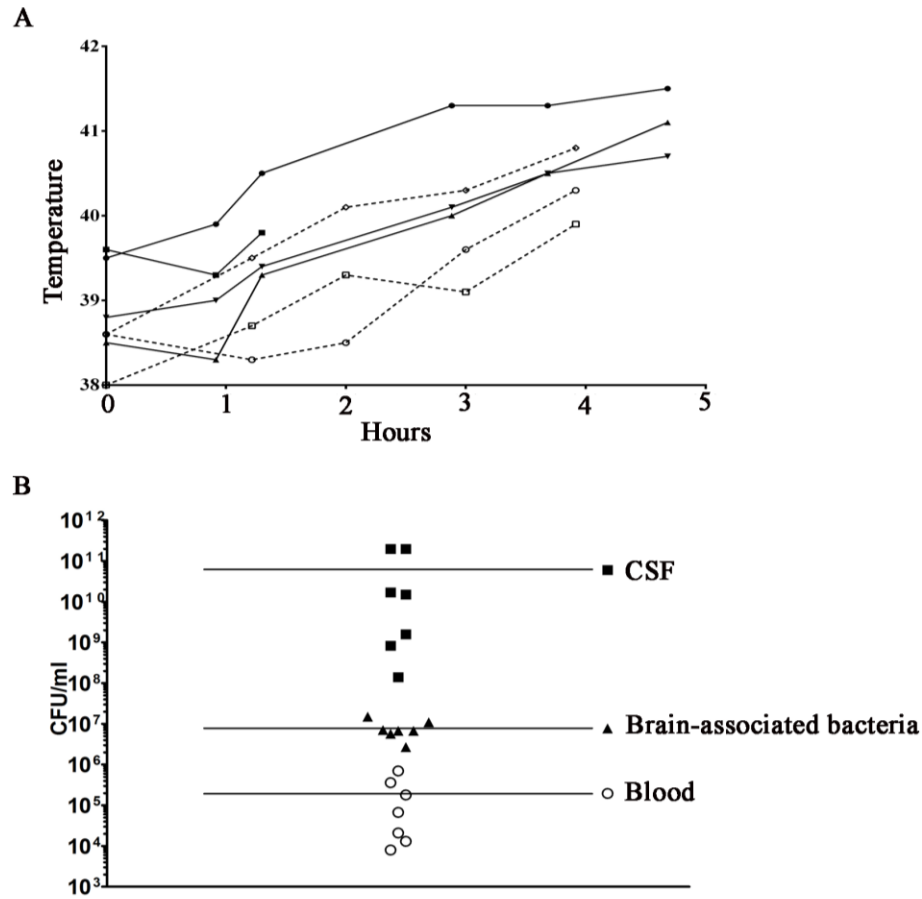

**Figure S2. Clinical symptoms and bacteriology analysis in 8 piglets after experimental infection with *S. suis* strain 10 Tn-Seq mutants.** (A) The rectal temperature was evaluated at time 0 and each hour after infection over a time course of 5 hours. (B) Bacterial loads in blood, CSF and brain after 5 hours of infection as determined by CFU determination. The horizontal bar represents the average for each group. Each symbol represents one individual animal.
