# Supplementary material
Source: publisher figshare collection journal article supplement (https://tandf.figshare.com/articles/dataset/_/12319646)
Supplement: Supplementary file 4 [file 4]

**Table S1.** Primers used in this study.

| Target Gene <sup>a</sup> | Putative function                         | Primer                                                   | Sequence (5'- 3')                                                                                                                             |
|--------------------------|-------------------------------------------|----------------------------------------------------------|-----------------------------------------------------------------------------------------------------------------------------------------------|
| SSU0144                  | Permease of a metal ABC- transporter      | Fssu0114-L1<br>Rssu0114-L2<br>Fssu0114-R2<br>Rssu0114-R1 | gtggggaattgtgactt<br>acgaacgaaaatcgacctgcataactttgccgcctgag<br>ttagaaaacaataaaccttgcataatggttatgggttctgacttc<br>agcatctttctttctgggtat         |
| <i>glA</i>               | Aquaporin                                 | Fssu0249-L1<br>Rssu0249-L2<br>Fssu0249-R2<br>Rssu0249-R1 | caccgacaaagtgtgaaaggatac<br>acgaacgaaaatcgacctgc ataataaggagtgcagtcgctaaa<br>ttagaaaacaataaaccttgcataatcatcaattgccgctgtt<br>ctgtccaaatcgcccac |
| SSU0469                  | unknown                                   | Fssu0469-L1<br>Rssu0469-L2<br>Fssu0469-R2<br>Rssu0469-R1 | agcaactcttccaaccaacct<br>acgaacgaaaatcgacctgcataatctctgaaaaacctgacca<br>ttagaaaacaataaaccttgcataatccccccccgcacag<br>taccagtcagtcgataataagc    |
| <i>fhs</i>               | Formate-tetrahydrofolate ligase           | Fssu0648-L1<br>Rssu0648-L2<br>Fssu0648-R2<br>Rssu0648-R1 | atcagcgccatttcgtca<br>acgaacgaaaatcgacctgctgtgcaatgtcaatatctgtttc tta<br>gaaaacaataaaccttgcataatggcagcagacgggacag<br>tggggtgcagctatttcaggt    |
| SSU0883                  | Permease of a Glu/Gln ABC-<br>Transporter | Fssu0883-L1<br>Rssu0883-L2<br>Fssu0883-R2<br>Rssu0883-R1 | gtcacgggaagctgggaaatct<br>acgaacgaaaatcgacctgctaactcgaatggggcgttaagc<br>ttagaaaacaataaaccttgcataatcttccaagcgggttaa<br>acattgatatttcggcgtttct  |
| <i>penA</i>              | Penicillin-binding protein 2b             | Fssu1186-L1<br>Rssu1186-L2<br>Fssu1186-R2<br>Rssu1186-R1 | ccttagtggggcgcaatgg<br>acgaacgaaaatcgacctgcataatcacgataaaaaataaata<br>ttagaaaacaataaaccttgcataatggcagtgctgtcct<br>tccccgtctggcctaataaata      |
| SSU1501                  | CsbD-like protein                         | Fssu1501-L1<br>Rssu1501-L2<br>Fssu1501-R2<br>Rssu1501-R1 | ttgtcatggactcatgtgac<br>acgaacgaaaatcgacctgcttcagatccagatagctg<br>ttagaaaacaataaaccttgcataatgagctagtcgaagatgc<br>cagagagggcacagatgagg         |
| SSU1869                  | Permease of an ABC transporter            | OZnu F<br>OZnu R                                         | aaatagtcggaatgacagcactgg<br>ctatgccgtaggtcgctgataa                                                                                            |
| SSU1940                  | DHH family protein                        | Fssu1940-L1<br>Rssu1940-L2<br>Fssu1940-R2<br>Rssu1940-R1 | cttgaccagtcgggcagaata<br>acgaacgaaaatcgacctgcacagcgcaatcaaccaataag<br>ttagaaaacaataaaccttgcataatggcggtattcgttga<br>attgcctcatttctatcag        |
| Spectinomycin            |                                           | Spec-F<br>Spec-R                                         | gcaggtcgatttctgtcgt<br>atgcaagggtttattgtttctaa                                                                                                |

<sup>a</sup> with exception of spectinomycin, gene name or gene locus based on genome sequences of P1/7 are provided.
