# Supplementary material
Source: publisher figshare collection journal article supplement (https://tandf.figshare.com/articles/dataset/_/12319646)
Supplement: Supplementary file 5 [file 4]

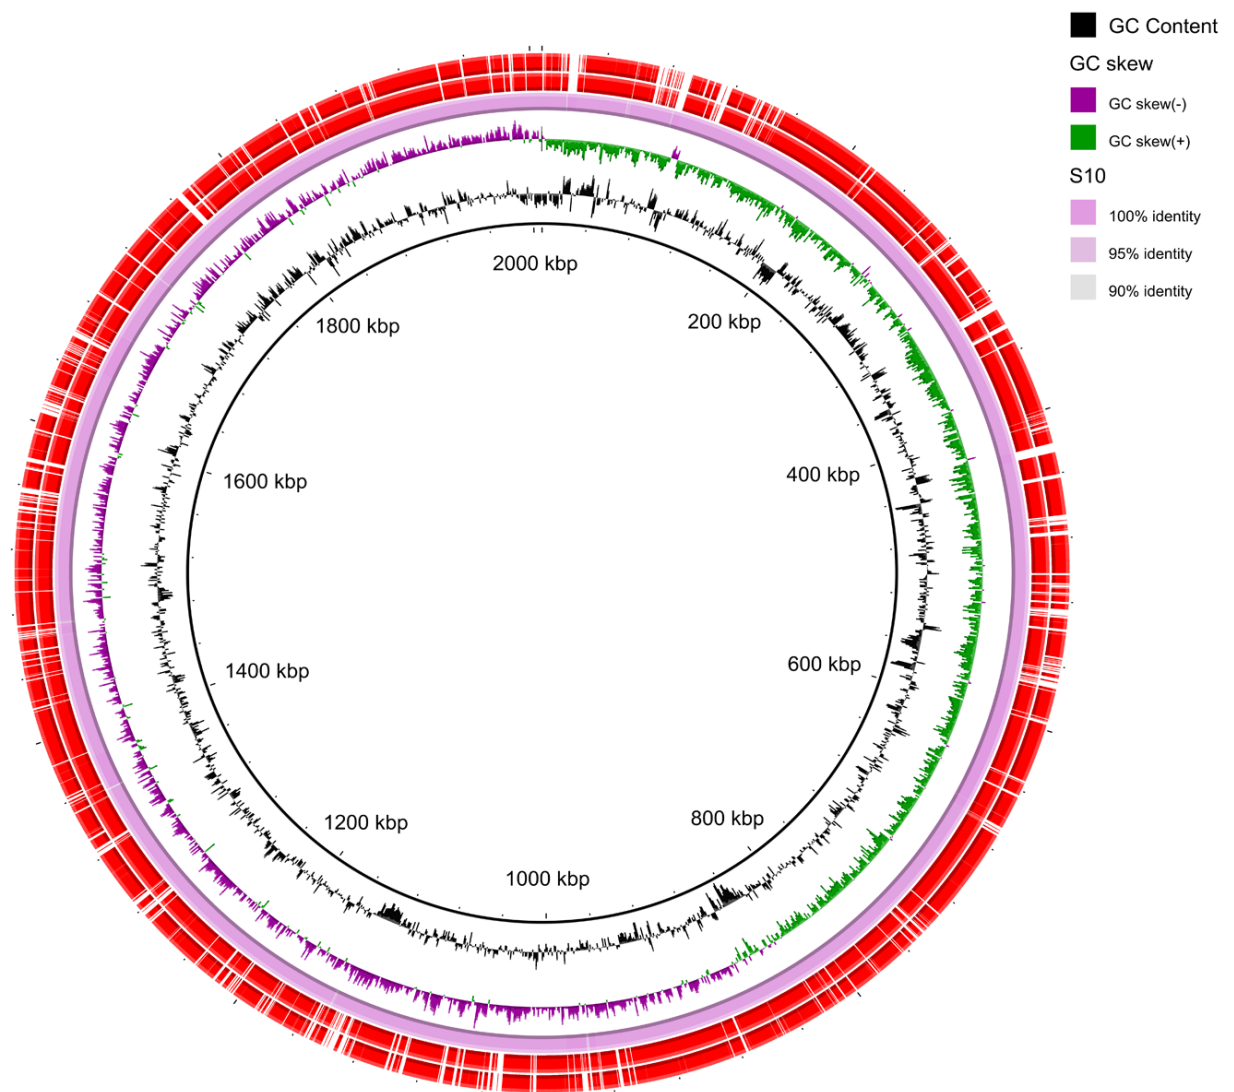

**Figure S3. Map of Tn-Seq mutations in *S. suis* libraries used in this study.** The inner ring represents the chromosome of public available P1/7 genome. Also depicted are the GC Skew and GC content. The pink ring shows a genome comparison of *S. suis* strain 10 with P1/7 genome. The outermost red ring depicts the position of Tn-Seq mutations detected after pig infection (output) and the second most outer ring depicts the Tn-Seq mutations in the inoculum (input).
